# The Flavonoid Apigenin Downregulates CDK1 by Directly Targeting Ribosomal Protein S9

Yosuke Iizumi<sup>1</sup>, Masakatsu Oishi<sup>1,2</sup>, Tomoyuki Taniguchi<sup>1</sup>, Wakana Goi<sup>1</sup>, Yoshihiro Sowa<sup>1</sup>, Toshiyuki Sakai<sup>1\*</sup>

**1** Department of Molecular-Targeting Cancer Prevention, Graduate School of Medical Science, Kyoto Prefectural University of Medicine, Kawaramachi-Hirokoji, Kamigyo-ku, Kyoto, Japan, **2** Department of Urology, Graduate School of Medical Science, Kyoto Prefectural University of Medicine, Kawaramachi-Hirokoji, Kamigyo-ku, Kyoto, Japan

## Abstract

Flavonoids have been reported to inhibit tumor growth by causing cell cycle arrest. However, little is known about the direct targets of flavonoids in tumor growth inhibition. In the present study, we developed a novel method using magnetic FG beads to purify flavonoid-binding proteins, and identified ribosomal protein S9 (RPS9) as a binding partner of the flavonoid apigenin. Similar to treatment with apigenin, knockdown of RPS9 inhibited the growth of human colon cancer cells at the G2/M phase by downregulating cyclin-dependent kinase 1 (CDK1) expression at the promoter level. Furthermore, knockdown of RPS9 suppressed G2/M arrest caused by apigenin. These results suggest that apigenin induces G2/M arrest at least partially by directly binding and inhibiting RPS9 which enhances CDK1 expression. We therefore raise the possibility that identification of the direct targets of flavonoids may contribute to the discovery of novel molecular mechanisms governing tumor growth.

**Citation:** Iizumi Y, Oishi M, Taniguchi T, Goi W, Sowa Y, et al. (2013) The Flavonoid Apigenin Downregulates CDK1 by Directly Targeting Ribosomal Protein S9. PLoS ONE 8(8): e73219. doi:10.1371/journal.pone.0073219

**Editor:** Peiwen Fei, University of Hawaii Cancer Center, United States of America

**Received:** January 30, 2013; **Accepted:** July 17, 2013; **Published:** August 29, 2013

**Copyright:** © 2013 Iizumi et al. This is an open-access article distributed under the terms of the Creative Commons Attribution License, which permits unrestricted use, distribution, and reproduction in any medium, provided the original author and source are credited.

**Funding:** This work was supported by JSPS KAKENHI Grant Number 21890223 and 23689036. KAKENHI (<http://www.jsps.go.jp/english/e-grants/index.html>). The funders had no role in study design, data collection and analysis, decision to publish, or preparation of the manuscript.

**Competing interests:** The authors have declared that no competing interests exist.

\* E-mail: [tsakai@koto.kpu-m.ac.jp](mailto:tsakai@koto.kpu-m.ac.jp)

## Introduction

Flavonoids in vegetables and fruits have antitumor properties. Flavonoids were originally considered to exert anticarcinogenic effects through modification of cell surface signal transduction [1,2]. In contrast, we have first demonstrated that a typical flavonoid quercetin causes cell cycle arrest at the G1 phase [3]. After that, we and others have found that many other flavonoids cause cell cycle arrest at the G1 or G2/M phase by regulating a variety of cell cycle regulators [4–12]. However, little is known about the direct targets of flavonoids and their precise growth-inhibitory mechanisms.

The ribosome is composed of many ribosomal proteins and performs protein synthesis. However, ribosomal proteins are known to have other functions, which are called extraribosomal functions [13,14]. For instance, ribosomal proteins L5, L11, and L23 directly bind and inhibit murine double minute-2 (MDM2), leading to p53 activation [15–17]. Ribosomal protein S3 (RPS3) is a subunit in nuclear factor- $\kappa$ B (NF- $\kappa$ B) complexes [18], and the enterohemorrhagic *E. coli* O157:H7 effector NleH inhibits RPS3, resulting in suppression of the NF- $\kappa$ B pathway [19,20]. Although flavonoids activate p53 [21] and inhibit the NF- $\kappa$ B

pathway [22], the relationship between flavonoids and these extraribosomal functions is unknown.

To elucidate the precise molecular mechanisms of tumor growth inhibition by flavonoids, we attempted to identify the binding proteins of a major flavonoid apigenin using magnetic FG beads, which have succeeded in determining the receptors of pharmacological agents such as thalidomide [23,24].

## Materials and Methods

### Reagents

Apigenin was purchased from Wako Pure Chemical Industries (Osaka, Japan) and dissolved in DMSO. Anti-ribosomal protein S9 (Abcam, Cambridge, UK) and p21 (Santa Cruz Biotechnology Inc., Santa Cruz, CA, USA) rabbit polyclonal antibodies, and anti-cyclin-dependent kinase 1 (CDK1) (Santa Cruz), cyclin B1, histidine-tag, ribosomal protein S6 (Cell Signaling Technology, Danvers, MA, USA), and  $\beta$ -actin (Sigma, St. Louis, MO, USA) mouse monoclonal antibodies were used as primary antibodies.

## Cell culture

Human colon cancer cell lines HT-29 and SW620 were obtained as cell lines of the NCI-60 from the National Cancer Institute Developmental Therapeutics Program (NCI DTP). HT-29 and SW620 cells were cultured in DMEM supplemented with 10% fetal bovine serum, 4 mM glutamine, 50 units/ml penicillin, and 100 µg/ml streptomycin at 37°C in 5% CO<sub>2</sub>.

## Cell viability assay

Cell viability was determined using the Cell Counting Kit-8 (CCK-8) (Dojindo, Kumamoto, Japan). CCK-8 solution was added to the medium of apigenin-treated or siRNA-transfected HT-29 cells. Absorbance of the samples (450 nm) was measured using a multi-plate reader (Viento, Dainippon, Osaka, Japan) after 4 hr of incubation.

## Cell cycle analysis

HT-29 cells were treated with apigenin for 24 hr or transfected with siRPS9 or siCtrl and incubated for 72 hr. The cells were then harvested by trypsinization. After centrifugation, the cells were suspended in PBS containing 0.1% Triton X-100, 150 µg/ml RNase A, and 50 µg/ml propidium iodide to prepare and stain nuclei. The suspension was filtered through nylon mesh (Kurabo, Osaka, Japan). DNA content in stained nuclei was analyzed by FACSCalibur (Becton Dickinson, Franklin Lakes, NJ, USA).

## Immunoblot analysis

HT-29 and SW620 cells treated with apigenin or siRNAs were lysed with RIPA buffer (50 mM Tris-HCl [pH 8.0], 150 mM NaCl, 1% NP-40, 0.5% deoxycholic acid, 0.1% SDS, 1 mM DTT, 0.5 mM PMSF) for 30 min at 4°C and centrifuged. The supernatants were subjected to SDS-PAGE, and analyzed by immunoblotting.

## Preparation of apigenin-fixed beads

Magnetic FG beads with epoxy linkers were purchased from Tamagawa Seiki (Nagano, Japan). The beads were mixed with apigenin in DMF containing potassium carbonate at 37°C for 24 hr, washed twice with DMF, and then twice with deionized water. The resulting beads were stored at 4°C.

## Purification and identification of apigenin-binding proteins with apigenin-fixed beads and MALDI-TOF MS

HT-29 cells were lysed with binding buffer (50 mM Tris-HCl [pH 8.0], 150 mM NaCl, 1% NP-40, 1 mM DTT, 0.5 mM PMSF) for 30 min at 4°C and centrifuged. The supernatants were used as whole cell extracts of HT-29 cells. The extracts were incubated with apigenin-fixed or empty beads for 4 hr at 4°C. The beads were washed three times with binding buffer. The bound proteins were eluted with Laemmli dye, subjected to SDS-PAGE, silver-stained, and subjected to in-gel digestion by Sequencing Grade Modified Trypsin (Promega, Madison, WI, USA). The peptide fragments were analyzed using an Autoflex II mass spectrometer (Bruker Daltonics, Billerica, MA, USA). For the competitive binding assay, HT-29 extracts were

incubated with free apigenin for 1 hr before incubation with the beads.

## Plasmid construction and preparation of recombinant proteins

The 245-bp region between -245 and -1 of the CDK1 promoter was subcloned from the human genome into the pGV-B2 luciferase assay vector (Toyo Ink, Tokyo, Japan). The cDNA encoding RPS9 (accession #NM\_001013) was subcloned from a HT-29 cell cDNA library into pET-14b (Novagen, Madison, WI, USA). Recombinant histidine-tagged RPS9 protein was expressed in the *E. coli* strain BL21-CodonPlus (DE3)-RIPL (Stratagene, La Jolla, CA, USA) and purified using Ni-NTA Agarose (QIAGEN, Hilden, Germany).

## RNAi

The following Stealth RNAi oligonucleotides (Invitrogen, Carlsbad, CA, USA) were used: siRPS9 #1, 5'-CAUACUCGCCGAUCAGCUUCAGCUC-3'; siRPS9 #2, 5'-AUGUAAUCCAGCUUCAUCUUGCCCU-3'; siRPS6 #1, 5'-AAAGUUUGCGGAUUCUGCUAGCUCU-3'; siRPS6 #2, 5'-ACUGGCGGACAUCAUCUUCUUUAGA-3'. Only sense strands are shown. A Stealth RNAi negative control (siCtrl) (Invitrogen) was used. Transfection of siRNA oligos was performed using Lipofectamine RNAiMAX (Invitrogen).

## Real-time RT-PCR

Total cellular RNA was extracted from HT-29 cells using Sepasol-RNA I super (Nacalai Tesque, Kyoto, Japan), and cDNA was synthesized from total RNA using High-Capacity cDNA Reverse Transcription Kits (Applied Biosystems, Melbourne, Australia). cDNA was amplified by PCR using TaqMan Probes (Applied Biosystems) and an ABI 7300 Real-time PCR System (Applied Biosystems).

## Luciferase assay

The CDK1 reporter plasmid (pCDK1PF) or pGV-B2 (an empty plasmid) was transfected into HT-29 cells using Lipofectamine 2000 (Invitrogen). After 8 hr, the cells were treated with apigenin for 16 hr and then lysed. Luciferase activities of the cell lysates were measured using Luciferase Assay Reagent (Promega) and a Lumat LB 9507 luminometer (Berthold Technologies, Bad Wildbad, Germany) and normalized to the amounts of total protein in the cell lysates.

## Detection of newly synthesized proteins

HT-29 cells were treated with apigenin for 24 hr and incubated in methionine-free DMEM containing apigenin for 1 hr. The cells were then treated with 50 µM L-azidohomoalanine (Invitrogen) for 1 hr and lysed with the lysis buffer (50 mM Tris-HCl [pH 8.0], 1% SDS, 1× cComplete, Mini, EDTA-free (Roche Diagnostics, Indianapolis, IN, USA), 250 units/ml Benzonase (Novagen)). The proteins containing L-azidohomoalanine in the lysates were biotinylated with Click-iT Biotin Protein Analysis Detection Kit (Invitrogen). The biotinylated proteins were detected by immunoblotting with Pierce High Sensitivity Streptavidin-HRP (Thermo Scientific, Waltham, MA, USA).

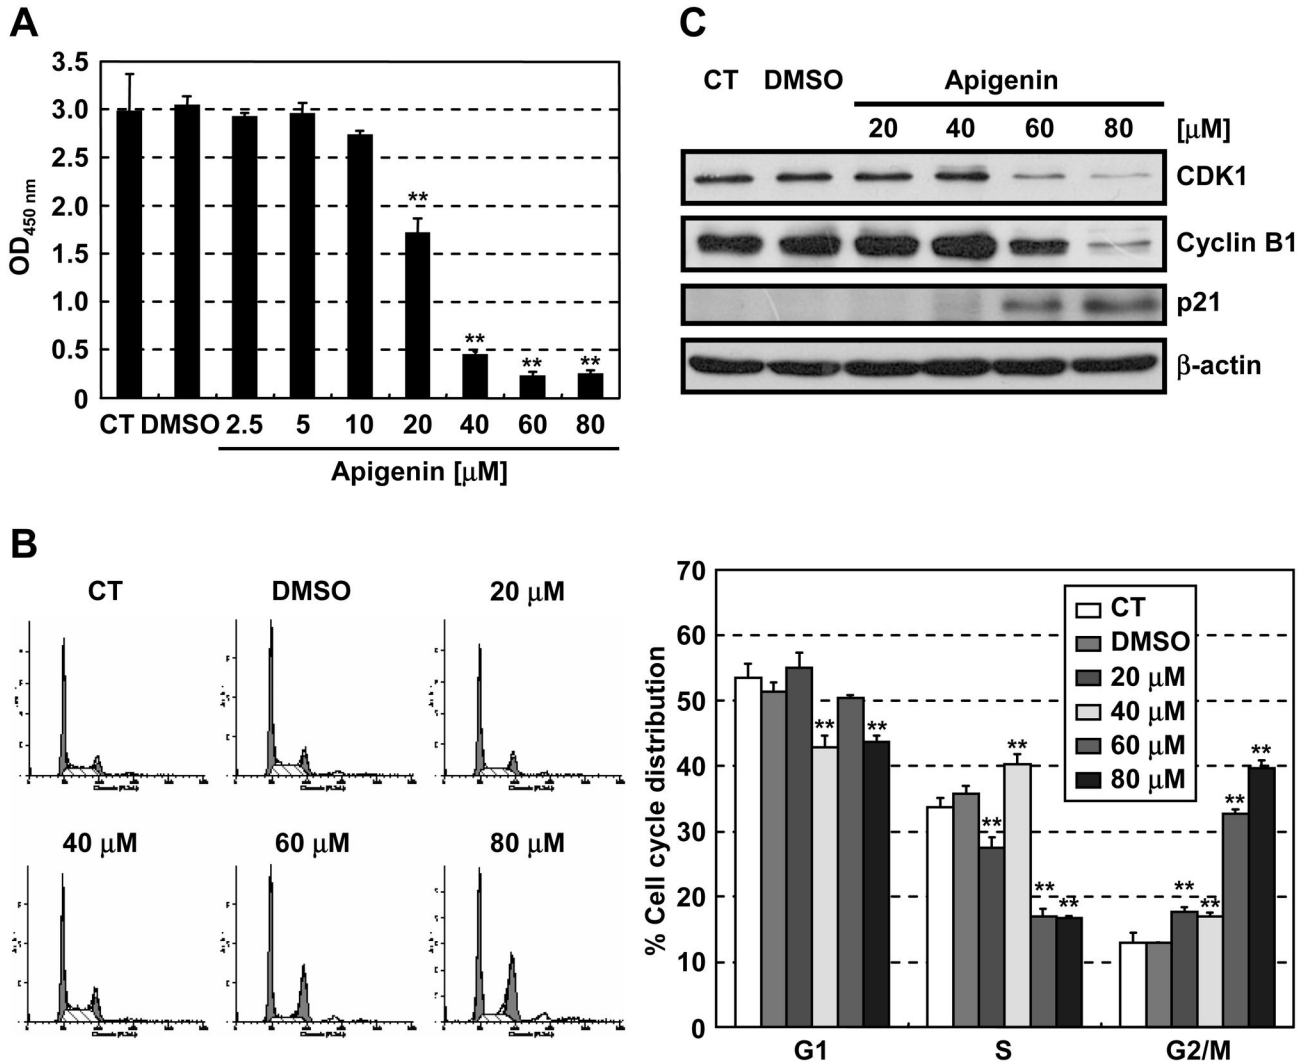

**Figure 1. Apigenin induces cell cycle arrest at the G2/M phase.** HT-29 cells were treated with the indicated concentrations of apigenin. (A) Relative viability of cells treated with apigenin for 72 hr was measured using the Cell Counting Kit-8. (B) Cell cycle analysis of cells treated with apigenin for 24 hr using flow cytometry. (C) Immunoblot analysis of G2/M phase regulators in cells treated with apigenin for 24 hr. CT: control, Data are means  $\pm$  SD (n = 3). \*\*P < 0.01 relative to control. doi: 10.1371/journal.pone.0073219.g001

**Statistics**

Data are represented as means and standard deviation (SD). All experiments were performed in triplicate. Comparisons were performed using one-way ANOVA followed by Bonferroni *post-hoc* tests or unpaired Student's *t*-test.

**Results and Discussion**

**Apigenin induces G2/M arrest with downregulation of CDK1**

Apigenin, one of the major flavonoids, is contained in various vegetables and fruits. Apigenin has anticarcinogenic and antitumor activities *in vivo* [25–27] and causes cell cycle arrest at the G2/M phase in many kinds of cancer cells [5,28–30] by

upregulating the CDK inhibitor p21 [31,32] and downregulating CDK1 and cyclin B1 [29]. In the present study, we also found that apigenin inhibited the growth of human colon cancer HT-29 cells in a dose-dependent manner (Figure 1A), and induced cell cycle arrest at the G2/M phase (Figure 1B). The G2/M phase arrest was associated with downregulation of CDK1 and cyclin B1, and upregulation of p21 (Figure 1C).

**Identification of ribosomal protein S9 as an apigenin-binding protein**

To identify the direct target of apigenin, apigenin-binding proteins were purified using magnetic FG beads with epoxy linkers [23,24]. A system was developed in which flavonoids were conjugated onto the beads with potassium carbonate.

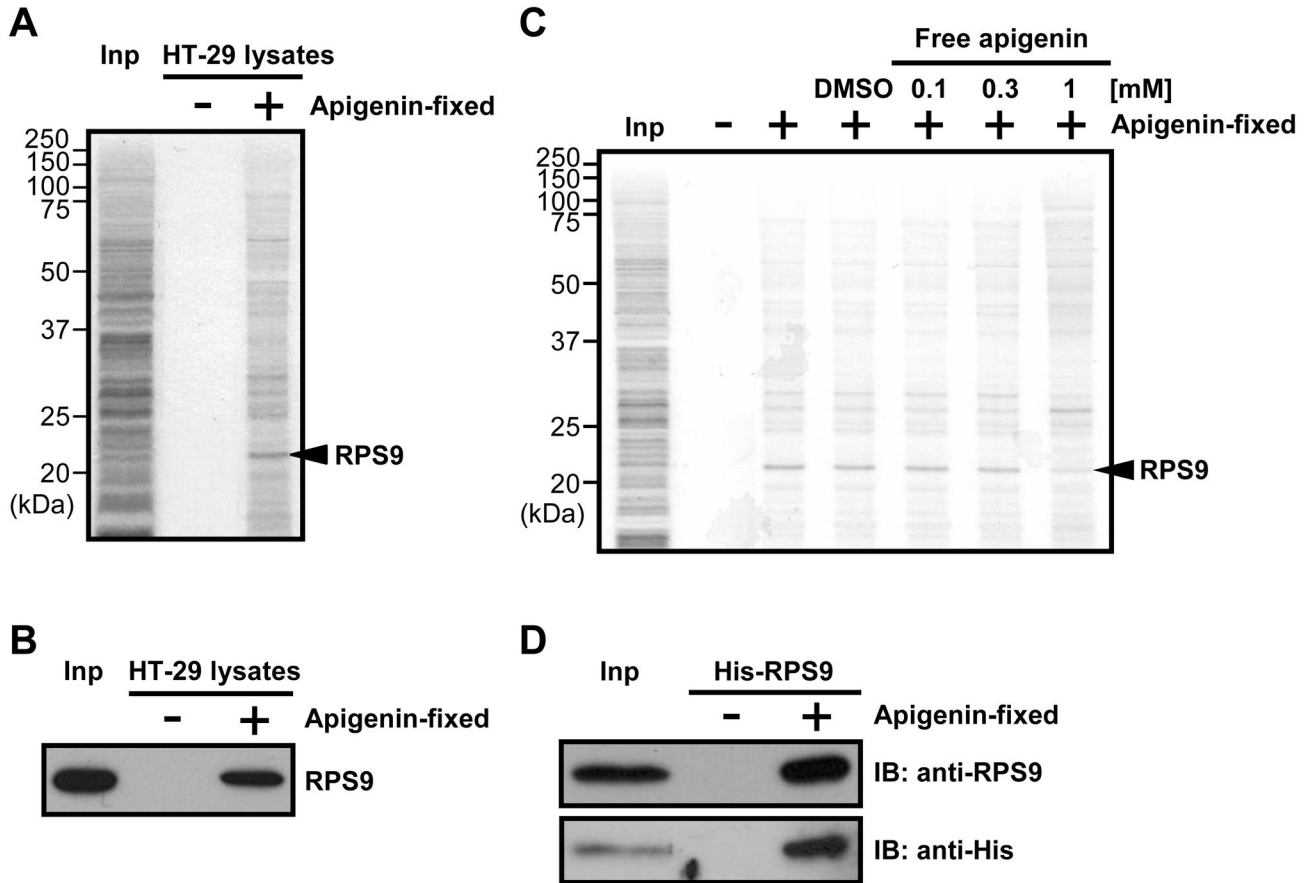

**Figure 2. Apigenin directly binds to RPS9.** (A) Apigenin-binding proteins were purified from whole cell extracts of HT-29 cells with apigenin-fixed (+) or empty (-) beads, and detected by silver staining. Mass spectrometry analysis identified RPS9 as an apigenin-binding protein. Inp: Whole cell extracts of HT-29 cells. (B) Confirmation of mass spectrometry analysis by immunoblotting with an anti-RPS9 antibody. Inp: Whole cell extracts of HT-29 cells. (C) Competition binding assay. The indicated concentrations of free apigenin were added to HT-29 cell extracts. After 1 hr, the extracts were incubated with apigenin-fixed (+) or empty (-) beads. Apigenin-binding proteins were purified and detected by silver staining. Inp: Whole cell extracts of HT-29 cells. (D) Purified recombinant His-RPS9 was incubated with apigenin-fixed (+) or empty (-) beads, and bound His-RPS9 was detected by immunoblotting with anti-RPS9 and anti-His antibodies. Inp: Purified recombinant His-RPS9.

doi: 10.1371/journal.pone.0073219.g002

Phenolic hydroxyl groups of flavonoids covalently bind to epoxy groups of the beads in the system. Apigenin was covalently conjugated to the beads using this system (Figure S1), and apigenin-fixed beads were incubated with whole cell extracts of HT-29 cells. One major apigenin-binding protein was purified from HT-29 cell extracts. This protein was identified as ribosomal protein S9 (RPS9) by mass spectrometry (Figure 2A). Identification of this protein was confirmed by immunoblotting (Figure 2B). Binding of RPS9 was selectively competed with increasing concentrations of apigenin (Figure 2C), suggesting that RPS9 specifically interacted with apigenin. Purified recombinant histidine-tagged RPS9 (His-RPS9) also bound to apigenin-fixed beads, suggesting that this interaction was direct (Figure 2D). Since RPS9 is an RNA-binding protein, we further examined whether RNA was required for this interaction. As shown in Figure S2, apigenin bound to RPS9 in

the presence of RNase A. These results indicate that apigenin directly binds to RPS9.

#### Knockdown of RPS9 induces G2/M arrest by downregulating CDK1

Recently, several extraribosomal functions of ribosomal proteins have been discovered, such as regulation of the stability of the p53 tumor-suppressor gene product [13,14]. Knockdown of RPS9 induced the expression of p53, and inhibited cell growth at the G1 phase in human osteosarcoma U2OS cells, which express wild-type p53 [33,34]. The effect of knockdown of RPS9 on the growth of HT-29 cells, which express mutant p53, was therefore examined next. The growth of HT-29 cells was suppressed by siRNA-mediated depletion of RPS9 (Figure 3A and B). This growth inhibition was caused by cell cycle arrest at the G2/M phase (Figure 3C). The G2/M

phase arrest was associated with the downregulation of CDK1 (Figure 3D). In contrast, cyclin B1 was upregulated in RPS9-knockdown cells, perhaps because cyclin B is expressed at maximum level in the G2/M phase [35]. On the other hand, knockdown of ribosomal protein S6 (RPS6) also downregulated CDK1 (Figure S3), suggesting that CDK1 downregulation may be a common cellular response due to loss of a ribosomal protein. These results suggest that knockdown of RPS9 arrests the cell cycle at the G2/M phase by downregulating CDK1 in a p53-independent manner.

### **Knockdown of RPS9 downregulates CDK1 at the promoter level**

The mechanism through which knockdown of RPS9 suppressed the expression of CDK1 was investigated next. Knockdown of RPS9 inhibited the expression of CDK1 mRNA (Figure 4A). The effect of RPS9 knockdown on CDK1 promoter activity was also examined. Silencing of RPS9 suppressed CDK1 promoter activity (Figure 4B). Similarly, apigenin suppressed the expression of CDK1 mRNA (Figure 4C) and CDK1 promoter activity (Figure 4D). These results indicate that knockdown of RPS9 as well as apigenin suppresses the expression of CDK1 at the promoter level, suggesting that apigenin downregulates CDK1 by inhibiting RPS9.

### **Apigenin induces G2/M arrest by binding to RPS9**

To clarify the role of RPS9 in apigenin-induced cell cycle arrest, we investigated whether knockdown of RPS9 influenced this cell cycle arrest as previously performed as to other target proteins [36,37]. Apigenin caused G2/M arrest in HT-29 cells transfected with control siRNA, but not in HT-29 cells transfected with RPS9-targeting siRNA (Figure 5A). The results show that RPS9 is required for the G2/M arrest caused by apigenin, suggesting that apigenin induces G2/M arrest by inhibiting RPS9. On the other hand, we examined whether apigenin inhibited nascent protein synthesis, since knockdown of RPS9 partially inhibited nascent protein synthesis [34]. As shown in Figure S4, apigenin decreased one of major nascent proteins indicated by an arrow with different molecular weight from that of CDK1, but not most of proteins. This reduction of nascent protein synthesis indicated by an arrow by apigenin might raise the possibility that apigenin affects protein synthesis through RPS9. We then performed the similar experiments using another human colon cancer cell line As shown in Figure 5B and C, knockdown of RPS9 as well as apigenin downregulated CDK1 in human colon cancer SW620 cells. These results suggest that apigenin downregulates CDK1 by inhibiting RPS9 not only in HT-29 cells but also in other human malignant tumor cells.

We have suggested that the flavonoid apigenin directly binds and inhibits RPS9, resulting in downregulation of CDK1 and

G2/M arrest. From these results, we suppose that RPS9 enhances CDK1 expression. On the other hand, it has been reported that inhibition of RPS9 induces p53 expression, leading to tumor suppression [33]. Consistent with these results, apigenin is known to enhance p53 expression in mouse 308 keratinocytes [38], human neuroblastoma NUB-7 cells [39], and human colon cancer HCT-116 cells [27], all of which express wild-type p53. Therefore, the inhibition of RPS9 by apigenin may be one of the mechanisms through which apigenin upregulates p53. Taken together, these findings suggest that RPS9 may contribute to tumor growth by enhancing CDK1 expression and suppressing p53. A screening of other RPS9 inhibitors may therefore be useful in development of cancer therapies.

Although we clarified a mechanism by which apigenin downregulated CDK1, several other mechanisms have been reported regarding the growth inhibition induced by apigenin. As shown in Figure 1C, apigenin upregulated p21 and downregulated cyclin B1 in a p53-independent manner, but this regulation was not explained by RPS9 (Figure 3D). Since G2/M arrest is also induced by p21 upregulation and cyclin B1 downregulation, we suppose that the G2/M arrest by depletion of RPS9 (Figure 3C) was weaker than that by apigenin (Figure 1B). Moreover, apigenin is known to inhibit the NF- $\kappa$ B pathway [22]. Therefore, other binding proteins of apigenin except RPS9 (Figure 2A) might explain the mechanisms described above.

In the present study, we first developed a method identifying the direct targets of flavonoids (Figure S1). Since flavonoids have a variety of beneficial bioactivities such as antitumor and antiinflammatory effects [40], identification of the binding proteins of flavonoids enables us to elucidate the molecular mechanisms underlying these bioactivities of flavonoids. In fact, we clarified that RPS9 regulated the expression of CDK1 and the cell cycle by identifying apigenin-binding proteins. Further elucidation of the binding proteins of other flavonoids using our method may lead to the discovery of novel molecular mechanisms.

Most recently, the binding proteins of apigenin have been identified using a phage display cDNA library and second generation sequencing [41]. However, RPS9 was not identified in the report. We suppose that the peptides of RPS9 in the phage display library did not have the proper conformation and posttranslational modifications, and that these peptides were not identified as apigenin-binding peptides.

In conclusion, the present study suggests that the flavonoid apigenin induces G2/M arrest by directly binding and inhibiting RPS9 which enhances CDK1 expression. Our method identifying the direct targets of flavonoids should contribute to clarification of novel mechanisms regulating the growth of malignant tumor cells.

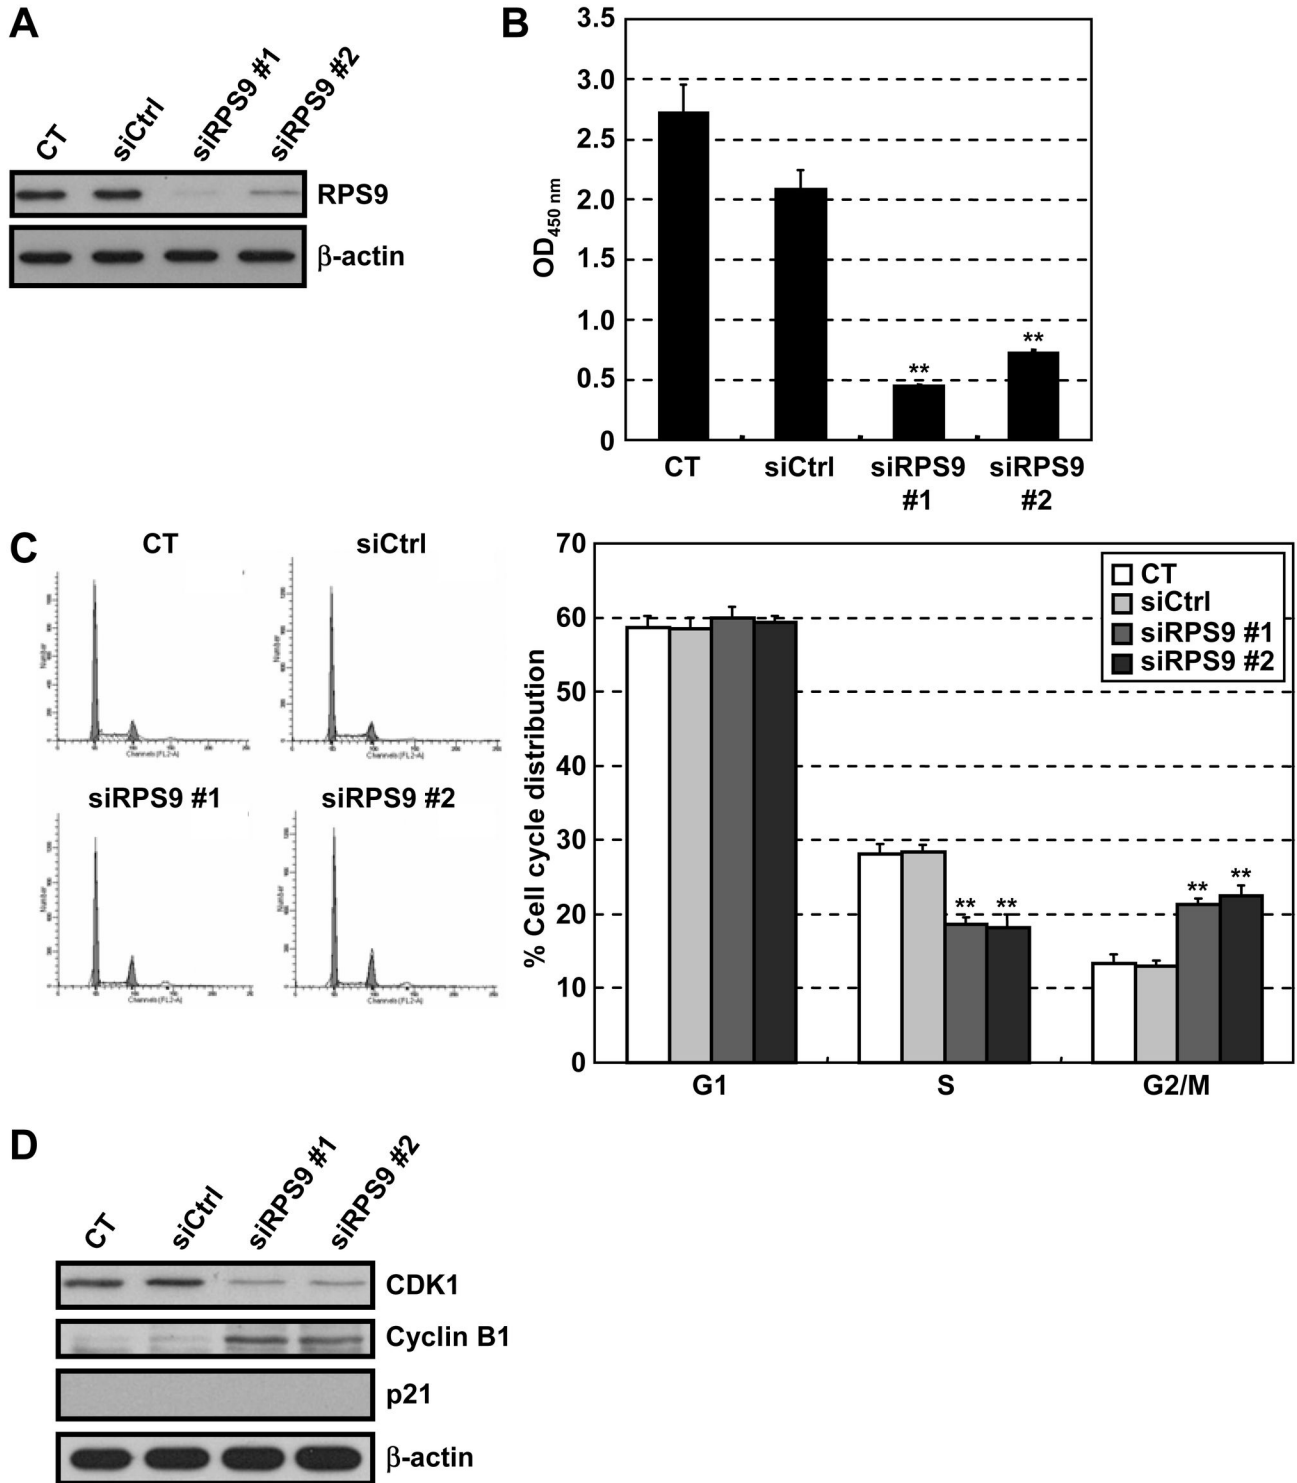

**Figure 3. Knockdown of RPS9 causes cell cycle arrest at the G2/M phase by repressing CDK1 expression.** HT-29 cells were transfected with two different siRNAs targeting human RPS9 (siRPS9 #1 and #2) or a non-targeting siRNA (siCtrl), and incubated for 72 hr. (A) Immunoblot analysis using an anti-RPS9 antibody.  $\beta$ -actin serves as a loading control. (B) Relative viability of transfected cells was examined using the Cell Counting Kit-8. (C) Cell cycle analysis of transfected cells using flow cytometry. (D) Immunoblot analysis of G2/M phase regulators in transfected cells. CT: control, Data are means  $\pm$  SD (n = 3). **\*\*** $P < 0.01$  relative to siCtrl.

doi: 10.1371/journal.pone.0073219.g003

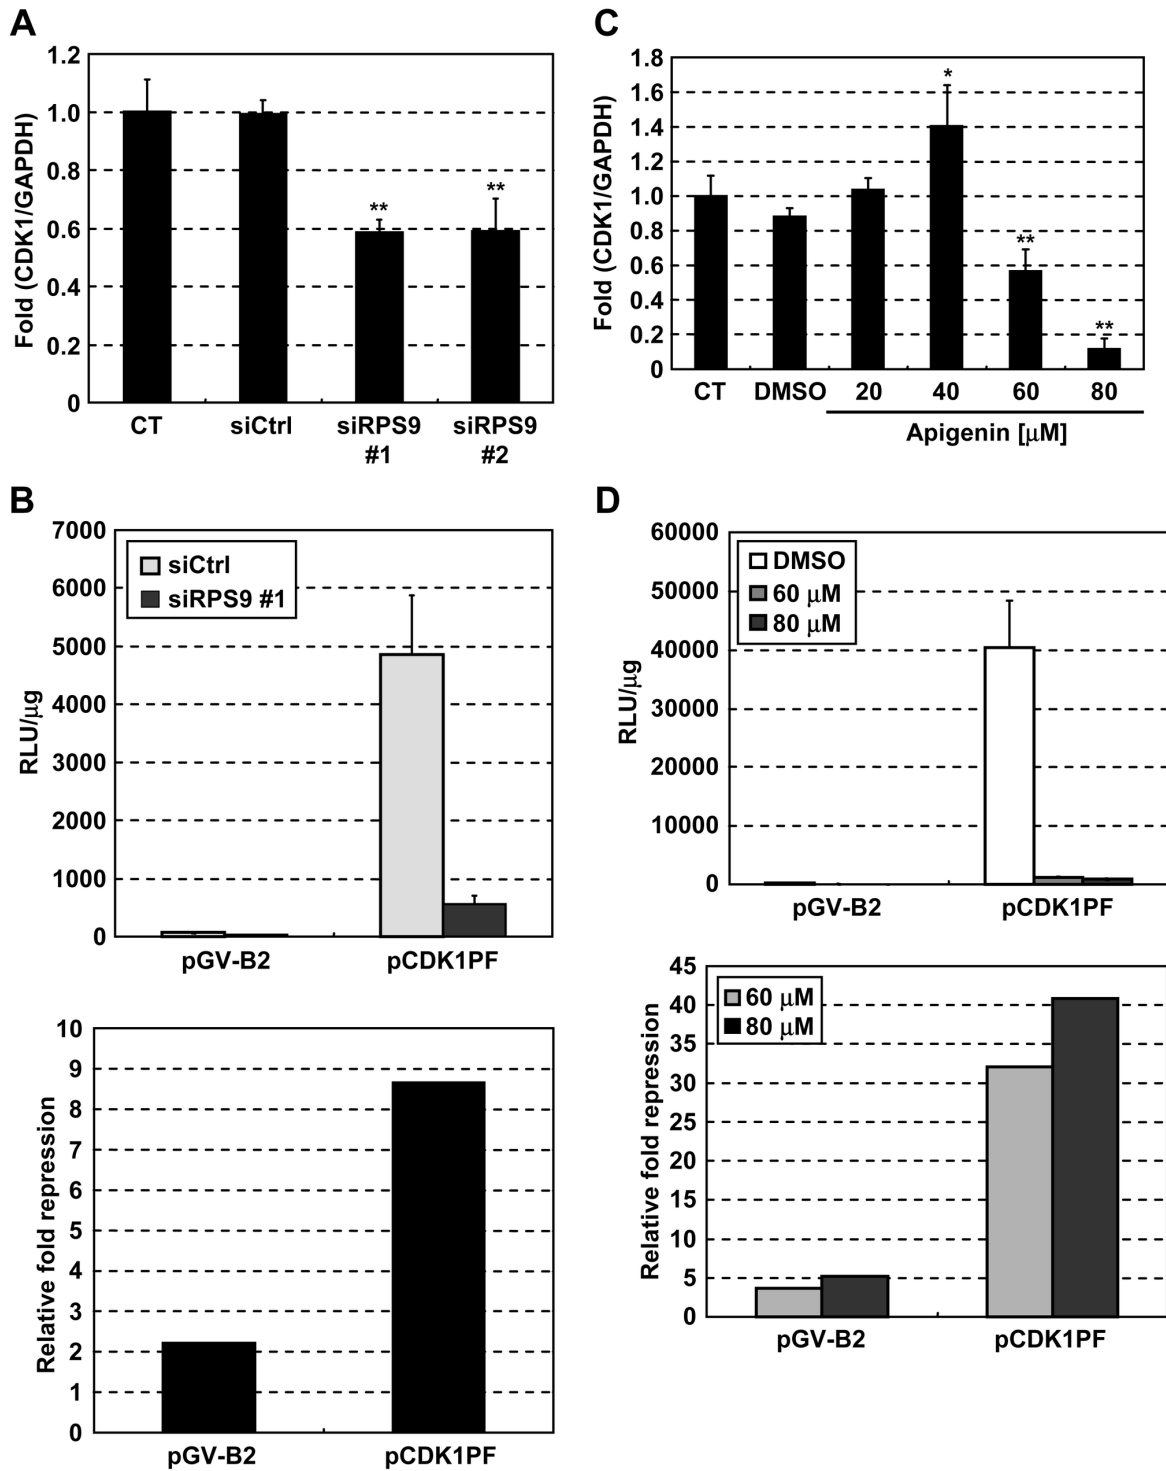

**Figure 4. Knockdown of RPS9 as well as apigenin downregulates CDK1 mRNA at the promoter level.** (A) HT-29 cells were transfected with siRPS9 or siCtrl. After 72 hr, CDK1 mRNA was quantified by real-time RT-PCR. (B) HT-29 cells were transfected with siRPS9 or siCtrl. After 48 hr, the cells were transfected with a reporter plasmid containing CDK1 promoter (pCDK1PF) or an empty plasmid (pGV-B2). After 24 hr, cell lysates were prepared for luciferase assays. (C) HT-29 cells were treated with the indicated concentrations of apigenin for 24 hr, and CDK1 mRNA was quantified by real-time RT-PCR. (D) HT-29 cells were transfected with pCDK1PF or pGV-B2. After 8 hr, the indicated concentrations of apigenin were added to the cells. After 16 hr, cell lysates were prepared for luciferase assays. CT: control, Data are means ± SD (n = 3). \**P* < 0.05, \*\**P* < 0.01 relative to control.

doi: 10.1371/journal.pone.0073219.g004

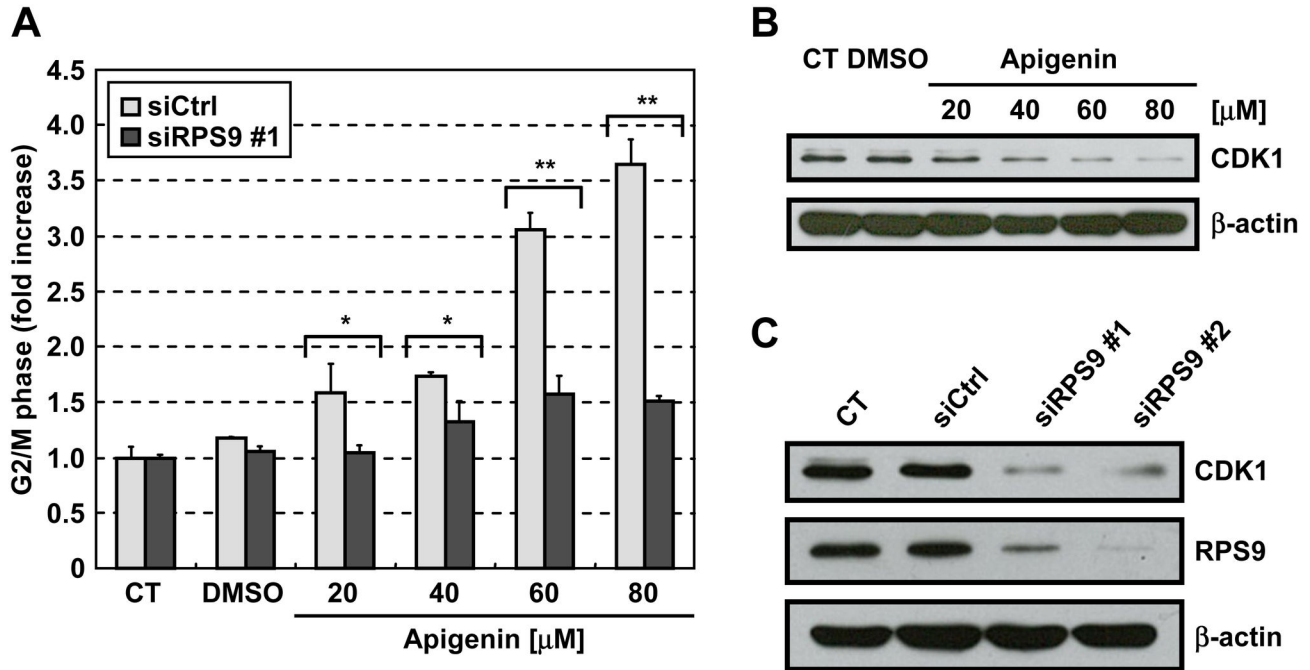

**Figure 5. Apigenin causes cell cycle arrest at the G2/M phase by binding to RPS9.** (A) HT-29 cells were transfected with siRPS9 or siCtrl. After 72 hr, the cells were treated with various concentrations of apigenin for 24 hr. Cell cycle distribution was analyzed by flow cytometry. The G2/M population in the samples without apigenin was normalized to 1. Only in this panel, comparisons were performed using unpaired Student's *t*-test. (B) SW620 cells were treated with the indicated concentrations of apigenin. After 24 hr, the cells were lysed with RIPA buffer. The lysates were analyzed by immunoblotting. (C) SW620 cells were transfected with siRPS9 or siCtrl. After 72 hr, the cells were lysed with RIPA buffer. The lysates were analyzed by immunoblotting. CT: control, Data are means  $\pm$  SD ( $n = 3$ ). \* $P < 0.05$ , \*\* $P < 0.01$  relative to siCtrl.

doi: 10.1371/journal.pone.0073219.g005



## Supporting Information

**Figure S1. Scheme for the fixation of apigenin onto magnetic FG beads with epoxy linkers.**

(TIF)

**Figure S2. RNase A does not inhibit the binding between apigenin and RPS9.** RNase A (150 µg/ml) was added to HT-29 cell extracts. After 1 hr, the extracts were incubated with apigenin-fixed (+) or empty (-) beads. Apigenin-binding proteins were purified, and bound RPS9 was detected by immunoblotting. Inp: Whole cell extracts of HT-29 cells.

(TIF)

**Figure S3. Knockdown of ribosomal protein S6 (RPS6) downregulates CDK1.** HT-29 cells were transfected with two different siRNAs targeting human RPS6 (siRPS6 #1 and #2) or a non-targeting siRNA (siCtrl). After 48 hr, the cells were lysed with RIPA buffer. The lysates were analyzed by immunoblotting. CT: control

## References

- Nishizuka Y (1984) The role of protein kinase C in cell surface signal transduction and tumour promotion. *Nature* 308: 693-698. doi: 10.1038/308693a0. PubMed: 6232463.
- Nishino H, Nagao M, Fujiki H, Sugimura T (1983) Role of flavonoids in suppressing the enhancement of phospholipid metabolism by tumor promoters. *Cancer Lett* 21: 1-8. doi:10.1016/0304-3835(83)90075-7. PubMed: 6640509.
- Yoshida M, Sakai T, Hosokawa N, Marui N, Matsumoto K et al. (1990) The effect of quercetin on cell cycle progression and growth of human gastric cancer cells. *FEBS Lett* 260: 10-13. doi: 10.1016/0014-5793(90)80053-L. PubMed: 2298289.
- Matsukawa Y, Marui N, Sakai T, Satomi Y, Yoshida M et al. (1993) Genistein arrests cell cycle progression at G<sub>2</sub>-M. *Cancer Res* 53: 1328-1331. PubMed: 8443813.
- Sato F, Matsukawa Y, Matsumoto K, Nishino H, Sakai T (1994) Apigenin induces morphological differentiation and G<sub>2</sub>-M arrest in rat neuronal cells. *Biochem Biophys Res Commun* 204: 578-584. doi: 10.1006/bbrc.1994.2498. PubMed: 7980517.
- Bai F, Matsui T, Ohtani-Fujita N, Matsukawa Y, Ding Y et al. (1998) Promoter activation and following induction of the p21/WAF1 gene by flavone is involved in G<sub>1</sub> phase arrest in A549 lung adenocarcinoma cells. *FEBS Lett* 437: 61-64. doi:10.1016/S0014-5793(98)01198-3. PubMed: 9804172.
- Zi X, Agarwal R (1999) Silibinin decreases prostate-specific antigen with cell growth inhibition via G<sub>1</sub> arrest, leading to differentiation of prostate carcinoma cells: implications for prostate cancer intervention. *Proc Natl Acad Sci U S A* 96: 7490-7495. doi:10.1073/pnas.96.13.7490. PubMed: 10377442.
- Hsu SL, Hsieh YC, Hsieh WC, Chou CJ (2001) Baicalein induces a dual growth arrest by modulating multiple cell cycle regulatory molecules. *Eur J Pharmacol* 425: 165-171. doi:10.1016/S0014-2999(01)01144-X. PubMed: 11513834.
- Deep G, Singh RP, Agarwal C, Kroll DJ, Agarwal R (2006) Silymarin and silibinin cause G<sub>1</sub> and G<sub>2</sub>-M cell cycle arrest via distinct circuitries in human prostate cancer PC3 cells: a comparison of flavanone silibinin with flavanolignan mixture silymarin. *Oncogene* 25: 1053-1069. doi: 10.1038/sj.onc.1209146. PubMed: 16205633.
- Khan N, Afaq F, Syed DN, Mukhtar H (2008) Fisetin, a novel dietary flavonoid, causes apoptosis and cell cycle arrest in human prostate cancer LNCaP cells. *Carcinogenesis* 29: 1049-1056. doi:10.1093/carcin/bgn078. PubMed: 18359761.
- Kim DI, Lee SJ, Lee SB, Park K, Kim WJ et al. (2008) Requirement for Ras/Raf/ERK pathway in naringin-induced G<sub>1</sub>-cell-cycle arrest via p21WAF1 expression. *Carcinogenesis* 29: 1701-1709. doi:10.1093/carcin/bgn055. PubMed: 18296682.
- Ong CS, Zhou J, Ong CN, Shen HM (2010) Luteolin induces G<sub>1</sub> arrest in human nasopharyngeal carcinoma cells via the Akt-GSK-3β-Cyclin D1 pathway. *Cancer Lett* 298: 167-175. doi:10.1016/j.canlet.2010.07.001. PubMed: 20655656.
- Warner JR, McIntosh KB (2009) How common are extraribosomal functions of ribosomal proteins? *Mol Cell* 34: 3-11. doi:10.1016/j.molcel.2009.03.006. PubMed: 19362532.
- Zhang Y, Lu H (2009) Signaling to p53: ribosomal proteins find their way. *Cancer Cell* 16: 369-377. doi:10.1016/j.ccr.2009.09.024. PubMed: 19878869.
- Lohrum MA, Ludwig RL, Kubbutat MH, Hanlon M, Vousden KH (2003) Regulation of HDM2 activity by the ribosomal protein L11. *Cancer Cell* 3: 577-587. doi:10.1016/S1535-6108(03)00134-X. PubMed: 12842086.
- Dai MS, Lu H (2004) Inhibition of MDM2-mediated p53 ubiquitination and degradation by ribosomal protein L5. *J Biol Chem* 279: 44475-44482. doi:10.1074/jbc.M403722200. PubMed: 15308643.
- Dai MS, Zeng SX, Jin Y, Sun XX, David L et al. (2004) Ribosomal protein L23 activates p53 by inhibiting MDM2 function in response to ribosomal perturbation but not to translation inhibition. *Mol Cell Biol* 24: 7654-7668. doi:10.1128/MCB.24.17.7654-7668.2004. PubMed: 15314173.
- Wan F, Anderson DE, Barnitz RA, Snow A, Bidere N et al. (2007) Ribosomal protein S3: a KH domain subunit in NF-κB complexes that mediates selective gene regulation. *Cell* 131: 927-939. doi:10.1016/j.cell.2007.10.009. PubMed: 18045535.
- Gao X, Wan F, Mateo K, Callegari E, Wang D et al. (2009) Bacterial effector binding to ribosomal protein S3 subverts NF-κB function. *PLOS Pathog* 5: e1000708.
- Wan F, Weaver A, Gao X, Bern M, Hardwidge PR et al. (2011) IKKβ phosphorylation regulates RPS3 nuclear translocation and NF-κB function during infection with *Escherichia coli* strain O157:H7. *Nat Immunol* 12: 335-343.
- Plaumann B, Fritsche M, Rimpler H, Brandner G, Hess RD (1996) Flavonoids activate wild-type p53. *Oncogene* 13: 1605-1614. PubMed: 8895505.
- Liang YC, Huang YT, Tsai SH, Lin-Shiau SY, Chen CF et al. (1999) Suppression of inducible cyclooxygenase and inducible nitric oxide synthase by apigenin and related flavonoids in mouse macrophages. *Carcinogenesis* 20: 1945-1952. doi:10.1093/carcin/20.10.1945. PubMed: 10506109.
- Shimizu N, Sugimoto K, Tang J, Nishi T, Sato I et al. (2000) High-performance affinity beads for identifying drug receptors. *Nat Biotechnol* 18: 877-881. doi:10.1038/78496. PubMed: 10932159.

24. Ito T, Ando H, Suzuki T, Ogura T, Hotta K et al. (2010) Identification of a primary target of thalidomide teratogenicity. *Science* 327: 1345-1350. doi:10.1126/science.1177319. PubMed: 20223979.
25. Wei H, Tye L, Bresnick E, Birt DF (1990) Inhibitory effect of apigenin, a plant flavonoid, on epidermal ornithine decarboxylase and skin tumor promotion in mice. *Cancer Res* 50: 499-502. PubMed: 2105157.
26. Birt DF, Mitchell D, Gold B, Pour P, Pinch HC (1997) Inhibition of ultraviolet light induced skin carcinogenesis in SKH-1 mice by apigenin, a plant flavonoid. *Anticancer Res* 17: 85-91. PubMed: 9066634.
27. Zhong Y, Krisanapun C, Lee SH, Nuansanit T, Sams C et al. (2010) Molecular targets of apigenin in colorectal cancer cells: Involvement of p21, NAG-1 and p53. *Eur J Cancer* 46: 3365-3374. doi:10.1016/j.ejca.2010.07.007. PubMed: 20709524.
28. Lepley DM, Li B, Birt DF, Pelling JC (1996) The chemopreventive flavonoid apigenin induces G<sub>2</sub>/M arrest in keratinocytes. *Carcinogenesis* 17: 2367-2375. doi:10.1093/carcin/17.11.2367. PubMed: 8968050.
29. Wang W, Heideman L, Chung CS, Pelling JC, Koehler KJ et al. (2000) Cell-cycle arrest at G<sub>2</sub>/M and growth inhibition by apigenin in human colon carcinoma cell lines. *Mol Carcinog* 28: 102-110. doi:10.1002/1098-2744(200006)28:2. PubMed: 10900467.
30. Ujiki MB, Ding XZ, Salabat MR, Bentrem DJ, Golkar L et al. (2006) Apigenin inhibits pancreatic cancer cell proliferation through G<sub>2</sub>/M cell cycle arrest. *Mol Cancer* 5: 76. doi:10.1186/1476-4598-5-76. PubMed: 17196098.
31. Lepley DM, Pelling JC (1997) Induction of p21/WAF1 and G<sub>1</sub> cell-cycle arrest by the chemopreventive agent apigenin. *Mol Carcinog* 19: 74-82. doi:10.1002/(SICI)1098-2744(199707)19:2. PubMed: 9210954.
32. Takagaki N, Sowa Y, Oki T, Nakanishi R, Yogosawa S et al. (2005) Apigenin induces cell cycle arrest and p21/WAF1 expression in a p53-independent pathway. *Int J Oncol* 26: 185-189. PubMed: 15586239.
33. Lindström MS, Zhang Y (2008) Ribosomal protein S9 is a novel B23/NPM-binding protein required for normal cell proliferation. *J Biol Chem* 283: 15568-15576. doi:10.1074/jbc.M801151200. PubMed: 18420587.
34. Lindström MS, Nistér M (2010) Silencing of ribosomal protein S9 elicits a multitude of cellular responses inhibiting the growth of cancer cells subsequent to p53 activation. *PLOS ONE* 5: e9578. doi:10.1371/journal.pone.0009578. PubMed: 20221446.
35. Bai C, Richman R, Elledge SJ (1994) Human cyclin F. *EMBO J* 13: 6087-6098. PubMed: 7813445.
36. Tsaytler P, Harding HP, Ron D, Bertolotti A (2011) Selective inhibition of a regulatory subunit of protein phosphatase 1 restores proteostasis. *Science* 332: 91-94. doi:10.1126/science.1201396. PubMed: 21385720.
37. Urusova DV, Shim JH, Kim DJ, Jung SK, Zykova TA et al. (2011) Epigallocatechin-gallate suppresses tumorigenesis by directly targeting Pin1. *Cancer Prev Res* 4: 1366-1377. doi:10.1158/1940-6207.CAPR-11-0301. PubMed: 21750208.
38. McVean M, Xiao H, Isobe K, Pelling JC (2000) Increase in wild-type p53 stability and transactivational activity by the chemopreventive agent apigenin in keratinocytes. *Carcinogenesis* 21: 633-639. doi:10.1093/carcin/21.4.633. PubMed: 10753197.
39. Torkin R, Lavoie JF, Kaplan DR, Yeger H (2005) Induction of caspase-dependent, p53-mediated apoptosis by apigenin in human neuroblastoma. *Mol Cancer Ther* 4: 1-11. doi:10.1186/1476-4598-4-1. PubMed: 15657348.
40. Nijveldt RJ, van Nood E, van Hoorn DE, Boelens PG, van Norren K et al. (2001) Flavonoids: a review of probable mechanisms of action and potential applications. *Am J Clin Nutr* 74: 418-425. PubMed: 11566638.
41. Arango D, Morohashi K, Yilmaz A, Kuramochi K, Parihar A et al. (2013) Molecular basis for the action of a dietary flavonoid revealed by the comprehensive identification of apigenin human targets. *Proc Natl Acad Sci U S A* 110: E2153-E2162. doi:10.1073/pnas.1303726110. PubMed: 23697369.
